# Supplementary material for: AMPK-PINK1/Parkin Mediated Mitophagy Is Necessary for Alleviating Oxidative Stress-Induced Intestinal Epithelial Barrier Damage and Mitochondrial Energy Metabolism Dysfunction in IPEC-J2
Source: MDPI journal article supplement (doi:10.3390/antiox10122010), 2021-12-18
Supplement: s1 [file s1]

**Table S1.** Primer sequences used for real-time PCR.

| Gene                        | 5'-Primer (F)         | 3'-Primer (R)        |
|-----------------------------|-----------------------|----------------------|
| <i>β-Actin</i>              | CTGCGGCATCCACGAAACT   | AGGGCCGTGATCTCCTTCTG |
| <i>CuZnSOD</i> <sup>1</sup> | CAGGTCCTCACTTCAATCC   | CCAAACGACTTCCASCAT   |
| <i>MnSOD</i> <sup>2</sup>   | GGACAAATCTGAGCCCTAACG | CCTTGTTGAAACCGAGCC   |
| <i>GPx1</i> <sup>3</sup>    | TGGGGAGATCCTGAATTG    | GATAAACTTGGGGTCGGT   |
| <i>GPx4</i> <sup>4</sup>    | GATTCTGGCCTTCCCTTGC   | TCCCCTTGGGCTGGACTTT  |
| <i>BNIP3</i> <sup>5</sup>   | GACTCGCCAGGTTACAGACA  | CAGTGACGTGCTTAGGACCC |
| <i>BNIP3L</i> <sup>6</sup>  | CCGGAGAACCAGAGACGGTA  | GGGCAGAGACTGTTCACCTT |
| <i>FUNDC-1</i> <sup>7</sup> | GGCAGCACCTGAAATCAACA  | GCCTAGCAAAAAGCCTCCCA |

<sup>1</sup>*CuZnSOD* = Copper and zinc superoxide dismutase;

<sup>2</sup>*MnSOD* = Manganese-containing superoxide dismutase;

<sup>3</sup>*GPx1* = Glutathione peroxidase 1;

<sup>4</sup>*GPx4* = Glutathione peroxidase 4.

<sup>5</sup>*BNIP3* = BCL2/adenovirus E1B 19 kDa interacting protein 3

<sup>6</sup>*BNIP3L* = BCL2/adenovirus E1B 19 kDa interacting protein 3L

<sup>7</sup>*FUNDC-1* = FUN14 domain containing 1

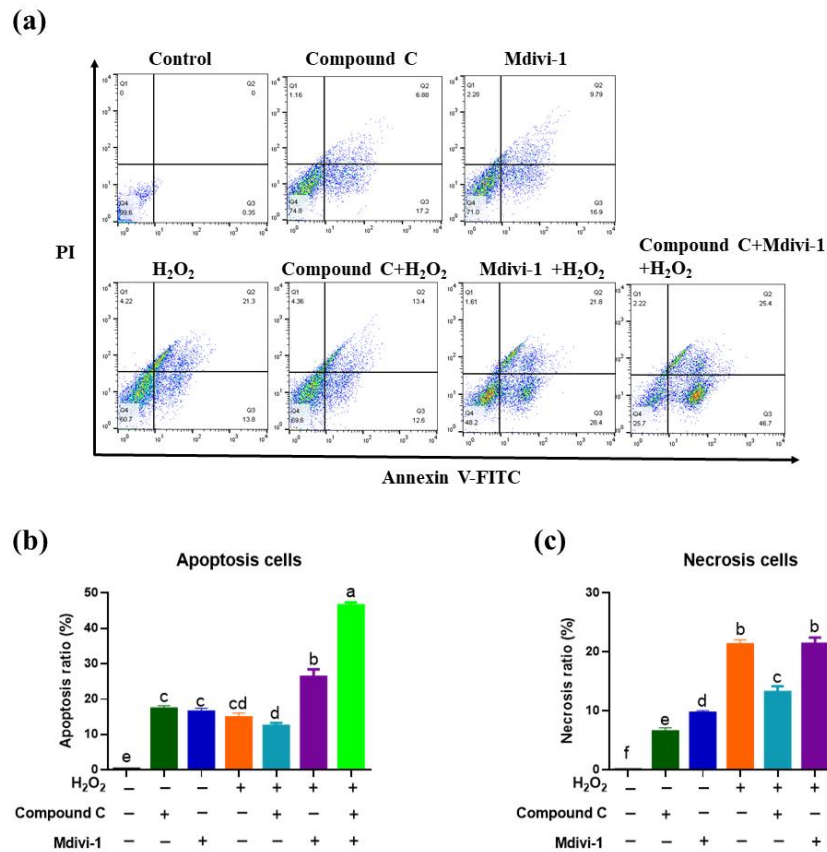

**Figure S1.** The effect of inhibiting AMPK and mitophagy on the ratio of apoptosis and necrosis cells in H<sub>2</sub>O<sub>2</sub>-induced oxidative stress model of intestinal epithelial cells. **(a)** In the H<sub>2</sub>O<sub>2</sub>-induced IPEC-J2 cell oxidative stress model, the detection of apoptosis using Annexin V-FITC/PI staining and flow cytometry; **(b)** In the H<sub>2</sub>O<sub>2</sub>-induced IPEC-J2 cell oxidative stress model, the effect of inhibiting AMPK signal pathway and mitophagy on the ratio of apoptosis cells (Annexin V-FITC<sup>+</sup> PI<sup>-</sup>); **(c)** In the H<sub>2</sub>O<sub>2</sub>-induced IPEC-J2 cell oxidative stress model, the effect of inhibiting AMPK signal pathway and mitophagy on the on the ratio of necrosis cells (Annexin V-FITC<sup>+</sup> PI<sup>+</sup>). Data expressed as average  $\pm$  SD. <sup>a,b,c,d</sup> Means with different letters differ significantly ( $p < 0.05$ ).

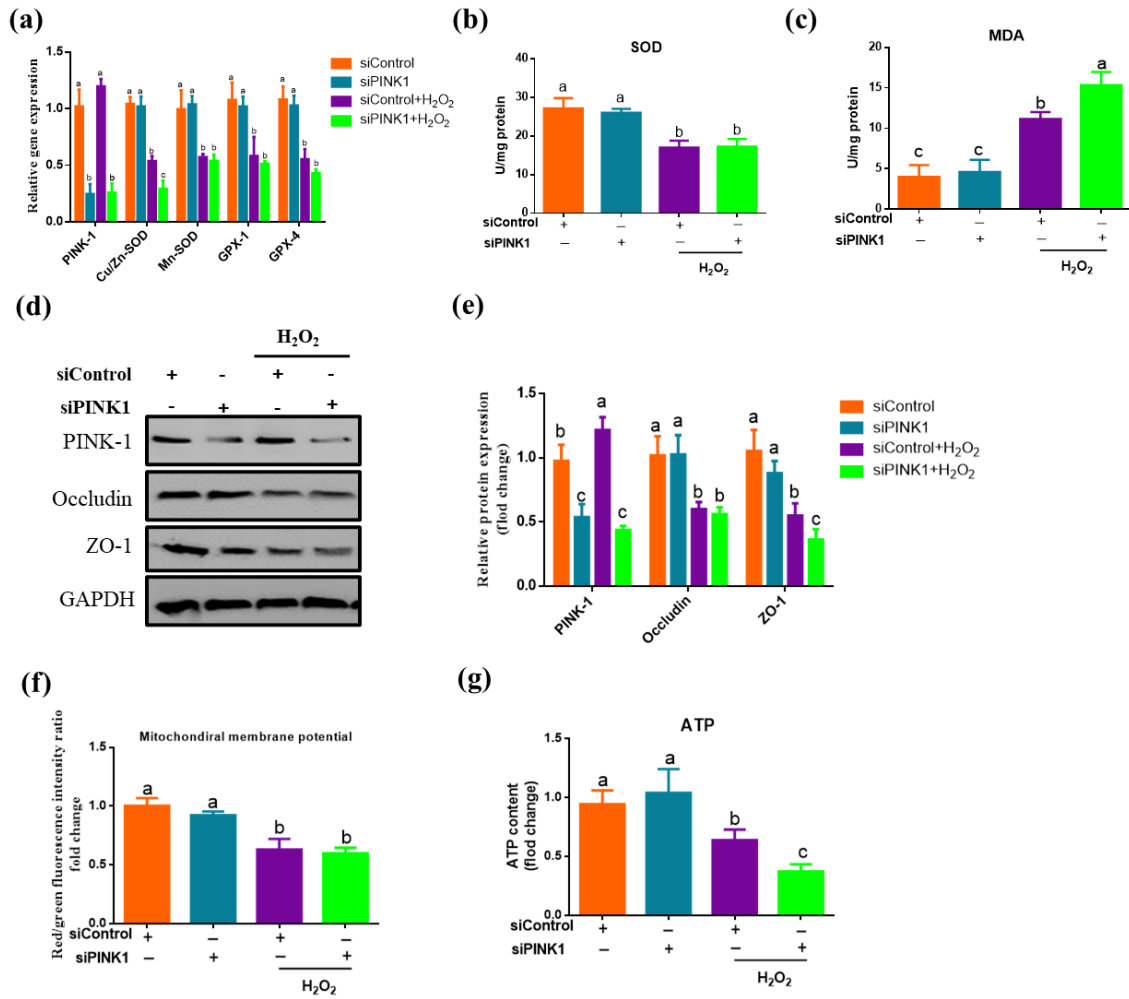

**Figure S2.** The effects of knockdown of PINK1 in the H<sub>2</sub>O<sub>2</sub>-induced oxidative stress model of intestinal epithelial cells. (a) The expression of *Cu/Zn-SOD*, *Mn-SOD*, *GPX-1*, *GPX-4*; (b) SOD activity; (c) MDA level; (d) Western analysis of PINK1, Occludin and ZO-1 protein expression; (e) Relative expression of PINK1, Occludin and ZO-1; (f) ATP production; (g) mitochondrial membrane potential; Data expressed as average  $\pm$  SD. <sup>a,b,c</sup> Means with different letters differ significantly ( $p < 0.05$ ).
